# Supplementary material for: Impact of the crystalline phase of binary silicide on its lithiation and delithiation properties
Source: Royal Society of Chemistry journal article supplement (doi:10.1039/d2ma00171c), 2022-01-01
Supplement: d2ma00171c1.pdf [file d2ma00171c1.pdf]

## *Electronic Supplementary Information*

# Impact of the Crystal Phase of Binary Silicide on its Lithiation and Delithiation Properties

*Yasuhiro Domi,<sup>a,b</sup> Hiroyuki Usui,<sup>a,b</sup> Takumi Ando,<sup>b,c</sup> Hiroki Sakaguchi<sup>a,b,\*</sup>*

<sup>a</sup>Department of Chemistry and Biotechnology, Graduate School of Engineering, Tottori University, 4-101 Minami, Koyama-cho, Tottori 680-8552, Japan.

<sup>b</sup>Center for Research on Green Sustainable Chemistry, Tottori University, 4-101 Minami, Koyama-cho, Tottori 680-8552, Japan.

<sup>c</sup>Department of Engineering, Graduate School of Sustainability Science, Tottori University, 4-101 Minami, Koyama-cho, Tottori 680-8552, Japan.

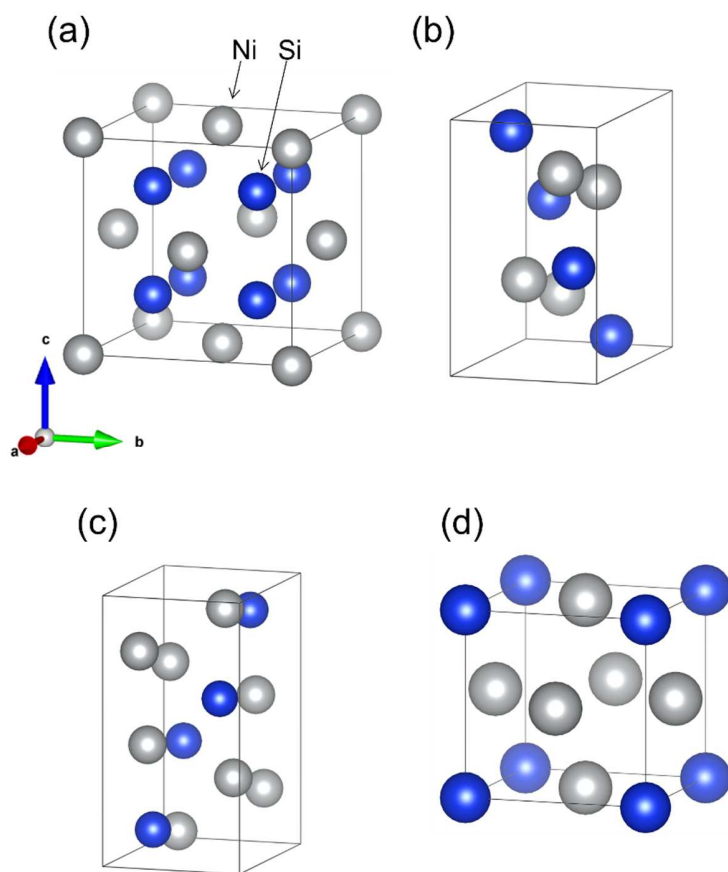

**Fig. S1.** Crystal structure of (a)  $\text{NiSi}_2$ , (b)  $\text{NiSi}$ , (c)  $\text{Ni}_2\text{Si}$  and (d)  $\text{Ni}_3\text{Si}$ .

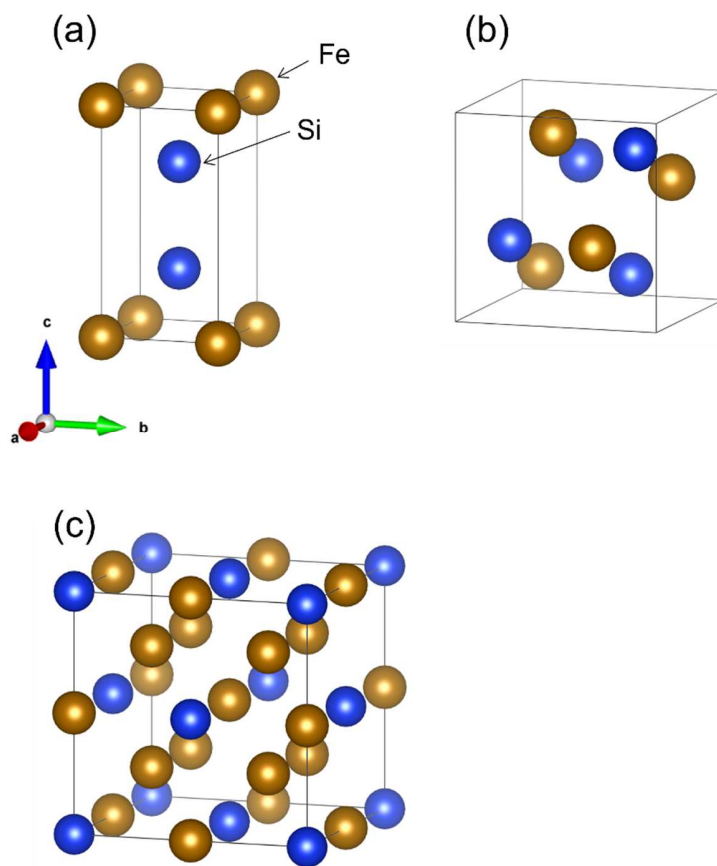

**Fig. S2.** Crystal structure of (a)  $\text{FeSi}_2$ , (b)  $\text{FeSi}$  and (c)  $\text{Fe}_3\text{Si}$ . The structure of  $\text{Fe}_2\text{Si}$  cannot be determined because  $Z$  number is unknown.

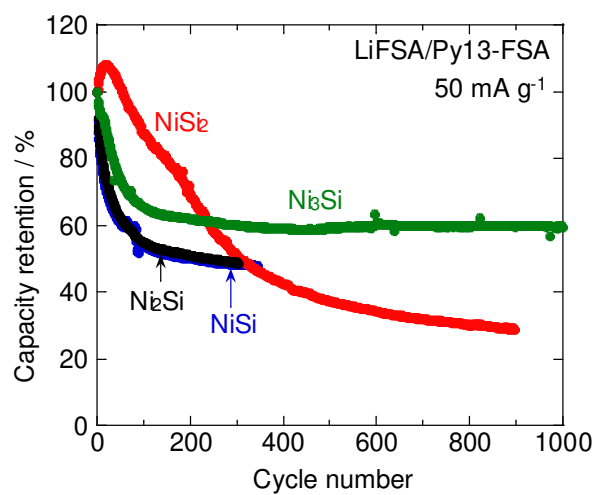

**Fig. S3.** Capacity retention of NiSi<sub>x</sub> ( $x = 2, 1, 1/2$  and  $1/3$ ) electrodes under a current density of 50 mA g<sup>-1</sup> in 1 M LiFSA/Py13-FSA.

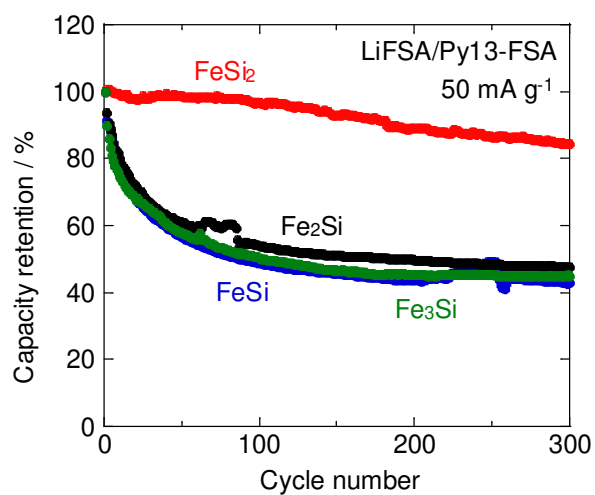

**Fig. S4.** Capacity retention of FeSi<sub>x</sub> ( $x = 2, 1, 1/2$  and  $1/3$ ) electrodes under a current density of 50 mA g<sup>-1</sup> in 1 M LiFSA/Py13-FSA.

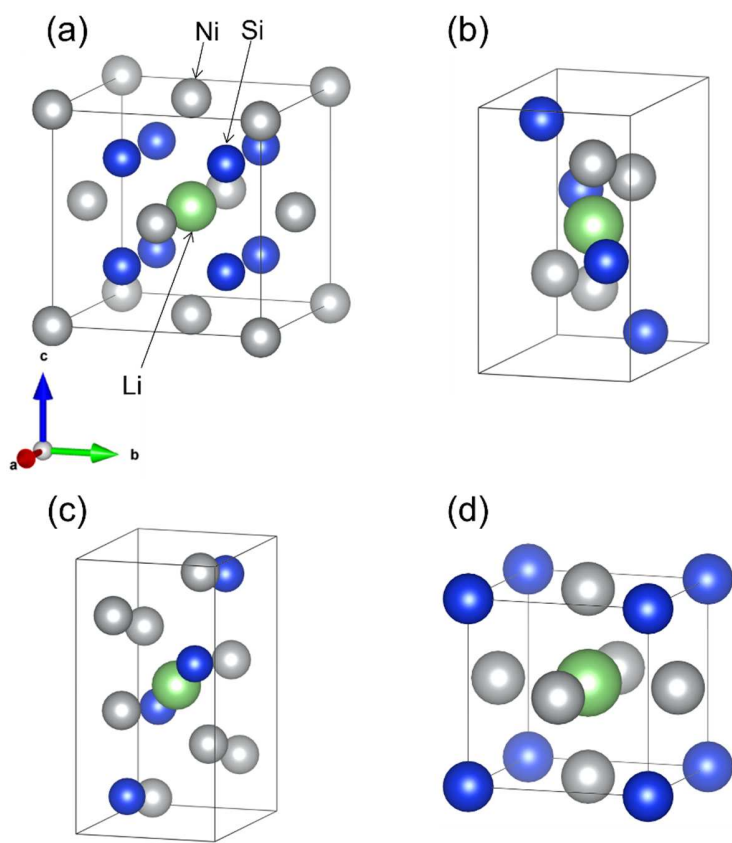

**Fig. S5.** Crystal structure of each lithiated  $\text{NiSi}_x$  ( $x = 2, 1, 1/2$  or  $1/3$ ). While  $\text{Li}_{0.25}\text{NiSi}_2$ ,  $\text{Li}_{0.25}\text{NiSi}$  and  $\text{Li}_{0.25}\text{Ni}_2\text{Si}$  were optimized crystal structure,  $\text{LiNiSi}_3$  did not converge. Hence, the charge density was calculated with Li at the center of the lattice as in the former three crystals.

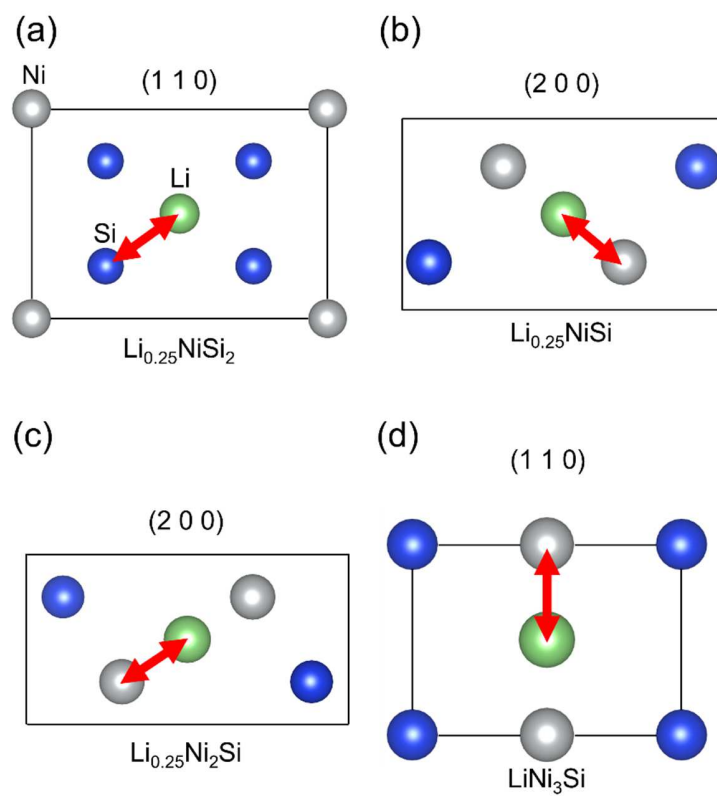

**Fig. S6.** Distance of between Li and nearest-neighbour atom in each Ni-Si lattice.

**Table S1.** Molar ratio, rotational speed, and treatment time for preparation of each silicide powder.

| Silicide           | Molar ratio       | Rotational speed / rpm | Treatment time / h |
|--------------------|-------------------|------------------------|--------------------|
| NiSi <sub>2</sub>  | Ni : Si = 1 : 2   | 380                    | 20                 |
| NiSi               | Ni : Si = 1 : 1   | 380                    | 10                 |
| Ni <sub>2</sub> Si | Ni : Si = 2 : 1   | 380                    | 10                 |
| Ni <sub>3</sub> Si | Ni : Si = 3 : 1   | 380                    | 40                 |
| FeSi <sub>2</sub>  | Fe : Si = 1 : 3.3 | 380                    | 100                |
| FeSi               | Fe : Si = 1 : 1   | 380                    | 10                 |
| Fe <sub>2</sub> Si | Fe : Si = 2 : 1   | 380                    | 10                 |
| Fe <sub>3</sub> Si | Fe : Si = 3 : 1   | 380                    | 10                 |



**Table S2.** Crystallite sizes of (upper) NiSi<sub>x</sub> and (lower) FeSi<sub>x</sub> ( $x = 2, 1, 1/2$  or  $1/3$ ).

|                       | NiSi <sub>2</sub> | NiSi | Ni <sub>2</sub> Si | Ni <sub>3</sub> Si |
|-----------------------|-------------------|------|--------------------|--------------------|
| Crystallite size / nm | 9.2               | 11.8 | 13.9               | 9.0                |
|                       | FeSi <sub>2</sub> | FeSi | Fe <sub>2</sub> Si | Fe <sub>3</sub> Si |
| Crystallite size / nm | 13.7              | 22.2 | 6.3                | 11.7               |

**Table S3.** Molar mass, density and crystal structure for each silicide.

| Silicide           | Molar mass / g mol <sup>-1</sup> | Density / g cm <sup>-3</sup> | Crystal system |
|--------------------|----------------------------------|------------------------------|----------------|
| NiSi <sub>2</sub>  | 114.87                           | 4.83                         | Cubic          |
| NiSi               | 86.78                            | 5.96                         | Orthorhombic   |
| Ni <sub>2</sub> Si | 145.47                           | 7.37                         | Orthorhombic   |
| Ni <sub>3</sub> Si | 204.17                           | 7.84                         | Cubic          |
| FeSi <sub>2</sub>  | 112.02                           | 5.04                         | Tetragonal     |
| FeSi               | 83.93                            | 6.17                         | Cubic          |
| Fe <sub>2</sub> Si | 139.78                           | –                            | Cubic          |
| Fe <sub>3</sub> Si | 195.62                           | 7.1 <sup>40</sup>            | Cubic          |
